# Supplementary material
Source: PubMed Central journal article supplement (PMC2740563)

Supplemental Fig. 1 Environmental pH cannot affect the secondary structures of 17-27HTE and LigBCon4

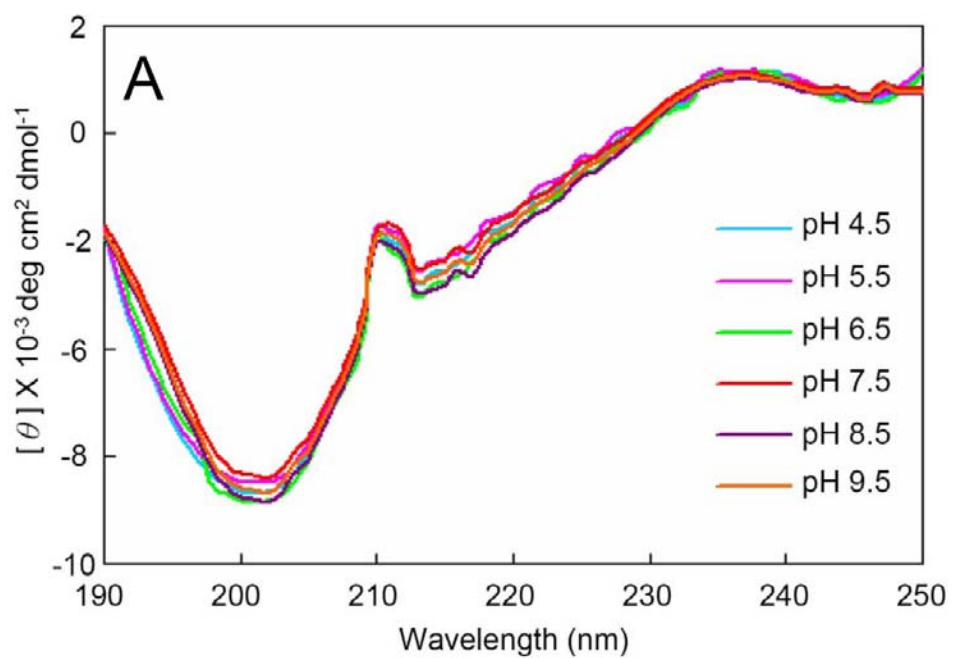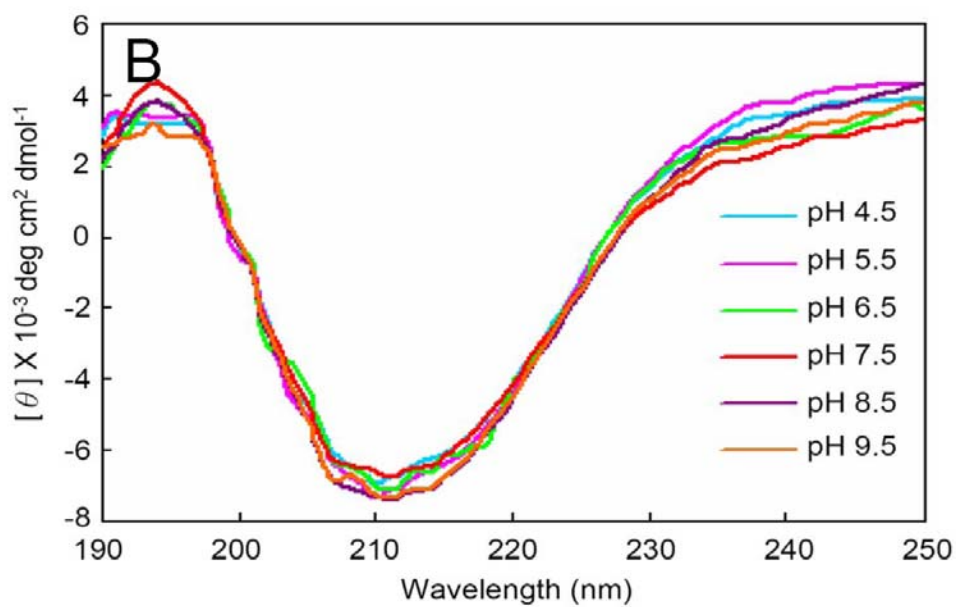

Supplemental Fig. 2 D341N mutation cannot affect the structure of LigBCon4

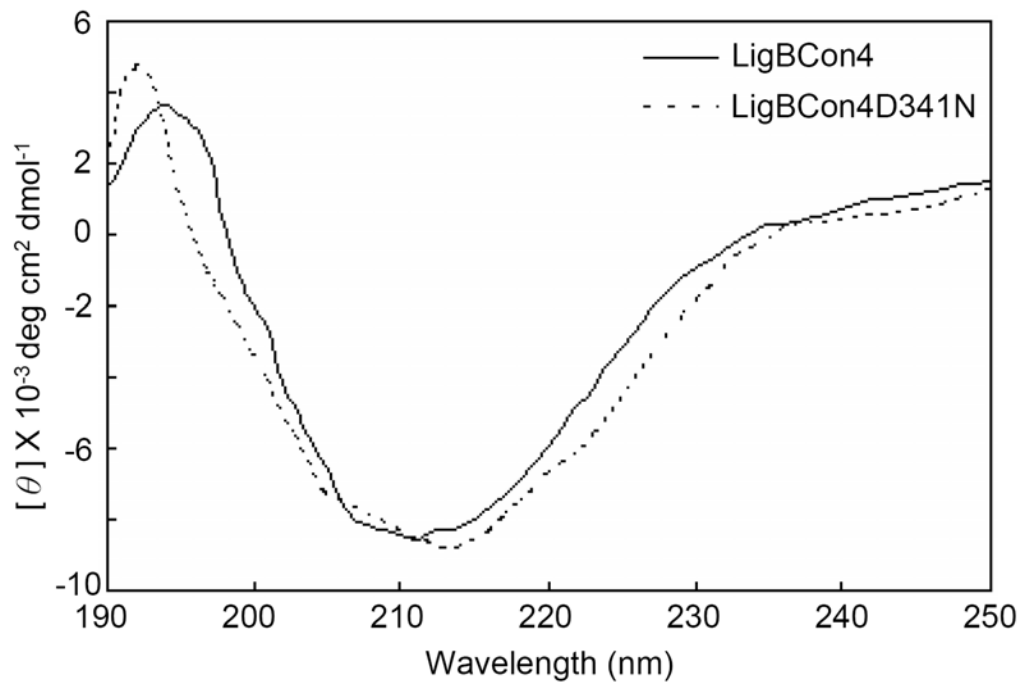

Supplement: supp_M109.004531_Suppfig1.pdf [file supp_M109.004531_Suppfig1.pdf]
